# Supplementary material for: A novel class of phosphorescent gold(iii) alkynyl-based organic light-emitting devices with tunable colour
Source: Royal Society of Chemistry journal article supplement (doi:10.1039/b503315b), 2005-01-01
Supplement: b503315b.pdf [file b503315b.pdf]

**A Novel Class of Phosphorescent Gold(III) Alkynyl-Based Organic Light Emitting  
Devices with Tunable Color**

Keith Man-Chung Wong,<sup>a</sup> Xiuling Zhu,<sup>b</sup> Ling-Ling Hung,<sup>a</sup> Nianyong Zhu,<sup>a</sup> Vivian Wing-Wah  
Yam\*<sup>a</sup> and Hoi-Sing Kwok\*<sup>b</sup>

<sup>a</sup> Centre for Carbon-Rich Molecular and Nano-Scale Metal-Based Materials Research,  
Department of Chemistry, The University of Hong Kong, Pokfulam Road, Hong Kong, P. R. China

Tel: (852) 2859-2153

E-mail: wwyam@hku.hk

<sup>b</sup> Department of Electrical & Electronic Engineering, The Hong Kong University of Science and  
Technology, Clear Water Bay, Kowloon, Hong Kong

Tel: (852)2358-7056

E-mail: eekwok@ee.ust.hk

## **Electronic Supplementary Information**

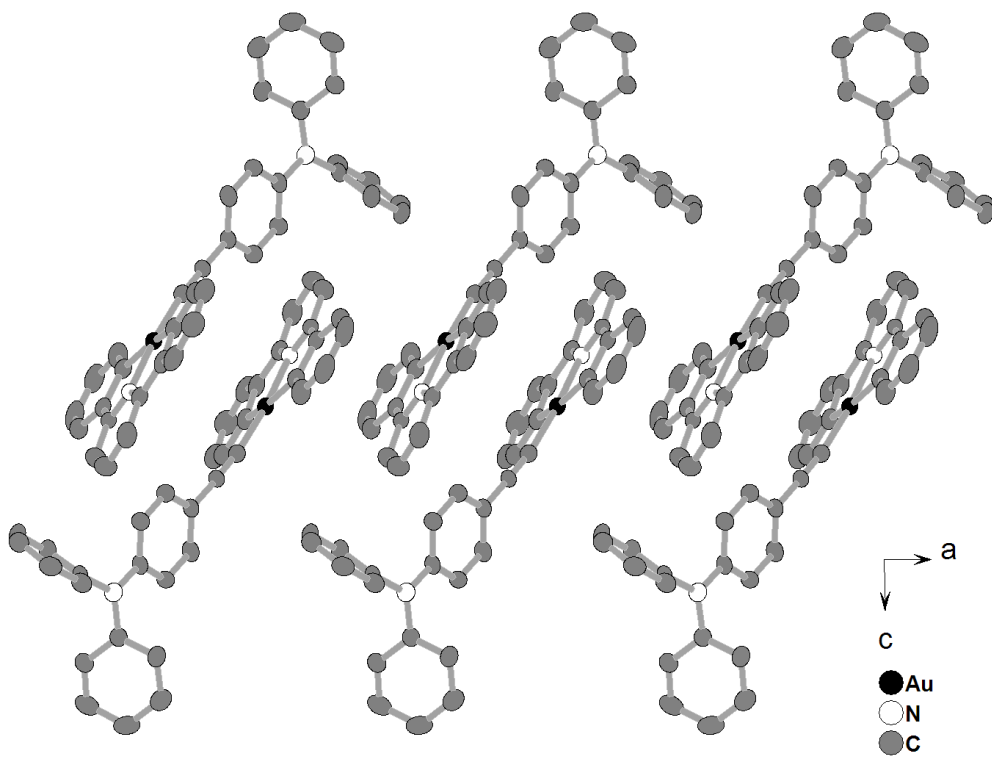

Fig. S1 Crystal packing of 1. Hydrogen atoms are omitted for clarity.

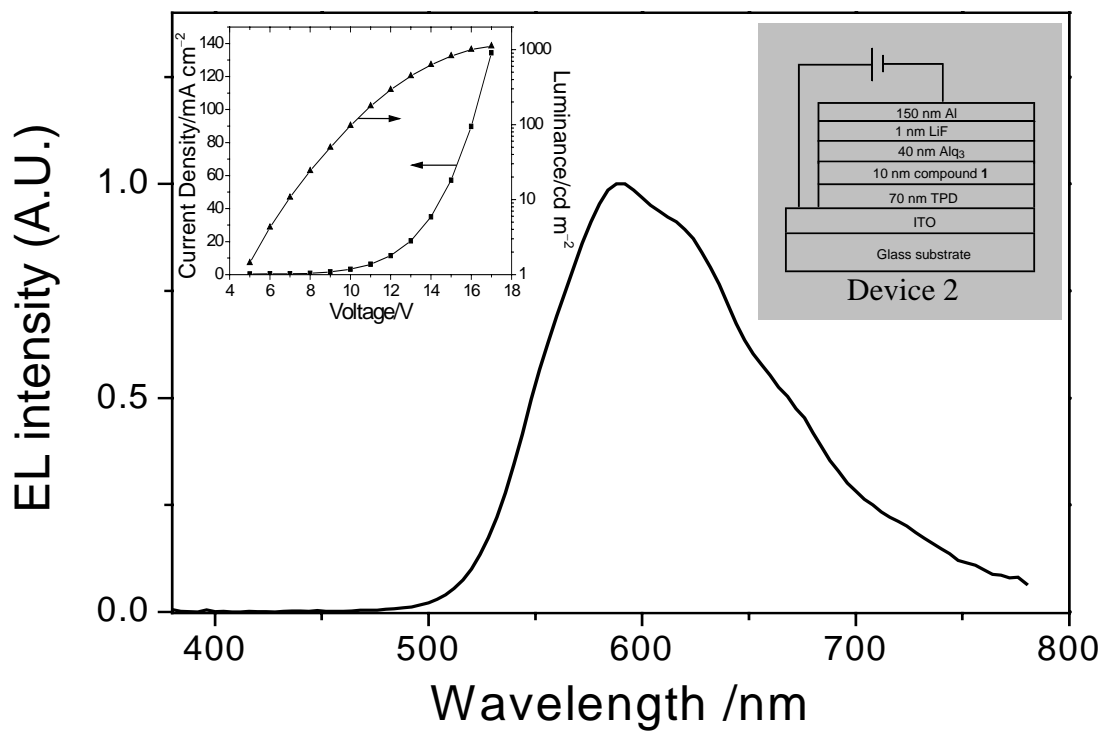

Fig. S2 Electroluminescence spectrum of device 2 upon applying 5 V DC voltage. Inset: (left) Current density and luminance *versus* voltage; (right) Schematic drawing showing the OLED structure of device 2.

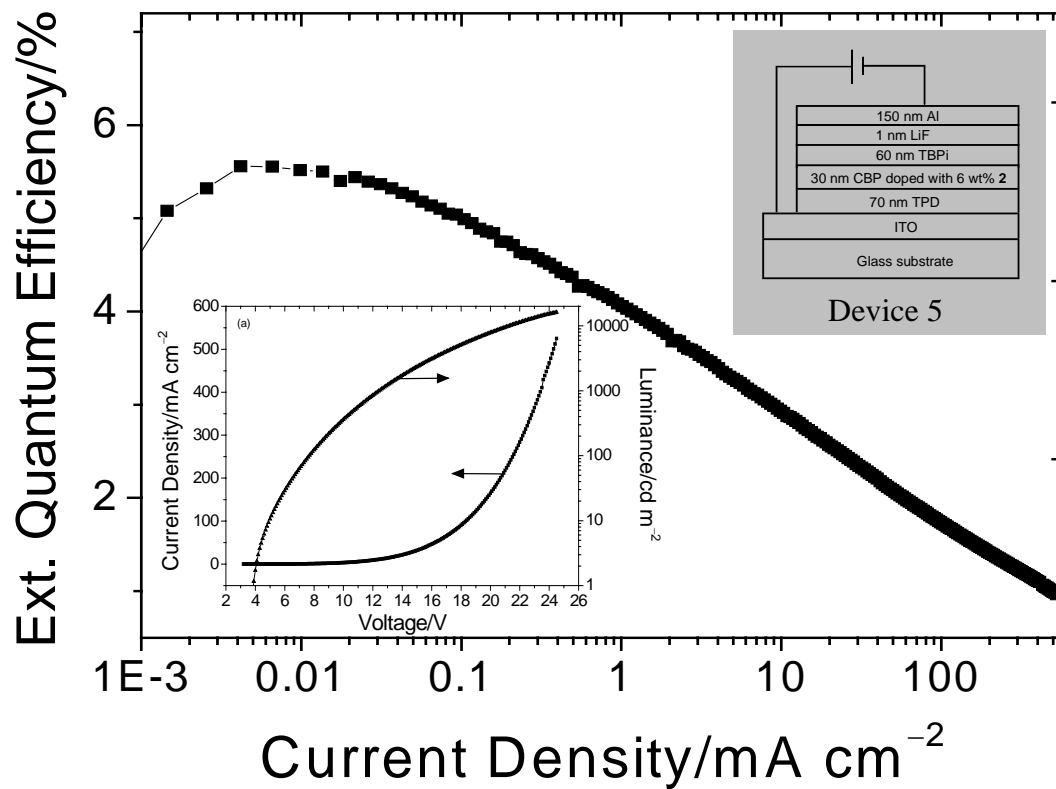

Fig. S3 Plot of external quantum efficiency *versus* current density of device 5. Inset: (left) Plot of current density and luminance *versus* voltage; (right) Schematic drawing showing the OLED structure of device 5.

## Characterization Data of compound 2

$^1\text{H}$  NMR (300 MHz,  $\text{CH}_2\text{Cl}_2$ , 298 K, relative to  $\text{Me}_4\text{Si}$ ):  $\delta$  8.05 (dd, 7.2 and 1.2 Hz, 2 H, C<sup>N</sup>C), 7.92 (t, 8.0 Hz, 1 H, C<sup>N</sup>C), 7.64 (dd, 7.2 and 1.2 Hz, 2 H, C<sup>N</sup>C), 7.56 (d, 8.0 Hz, 2 H, C<sup>N</sup>C), 7.48 (d, 8.8 Hz, 2 H, C<sup>N</sup>C), 7.42 (t, 7.2 Hz, 2 H, C<sup>N</sup>C H's), 7.32 – 7.26 (m, 6H, C<sup>N</sup>C,  $\text{C}_6\text{H}_4$  and N- $\text{C}_6\text{H}_5$ ), 7.14 – 7.02 (m, 8H, C<sup>N</sup>C,  $\text{C}_6\text{H}_4$  and N- $\text{C}_6\text{H}_5$ ); positive EI-MS:  $m/z$  694  $[\text{M}]^+$ ; IR (Nujol):  $2149\text{ cm}^{-1}$   $\nu(\text{C}\equiv\text{C})$ ; elemental analyses calcd for  $\text{C}_{25}\text{H}_{16}\text{NAu}\cdot\frac{1}{2}\text{CH}_2\text{Cl}_2$ (found): C 61.10 (60.85), H 3.53 (3.67), N 3.80 (3.78).

## OLEDs fabrication

Commercial 20–30  $\Omega/\square$  indium-tin oxide (ITO) coated glass was used as the starting substrates. The OLED devices were fabricated in the usual manner with sequential vacuum evaporation of the various organic layers on indium-tin oxide (ITO) coated glass substrates. The ITO glass substrates were cleaned in ultrasonic assisted detergent, followed by rinsing in deionized water before being dried in oven at 100 °C. After 10 min of  $\text{O}_2$ -plasma treatment, the substrates were transferred into a multi-source vacuum chamber with a base pressure of about  $1 \times 10^{-6}$  torr for OLEDs fabrication by sequential evaporation of the constituent organic layers. NPB and TPD were the hole-transport layer, CBP was the doping-host, BCP was the hole-blocking layer,  $\text{Alq}_3$  and TPBi were electron-transport layer. The cathode, consisting of lithium fluoride (LiF) and aluminum (Al), was subsequently evaporated through a shadow mask. The layer thickness during evaporation was monitored *in situ* using a quartz crystal oscillator. The current–voltage characteristics were measured using a Hewlett-Packard semiconductor parameter analyzer HP4145B. The EL spectra were measured using a PR650 spectrophotometer.
